# Supplementary material for: Additive Manufacturing of an Extended-Release Tablet of Tacrolimus
Source: MDPI journal article supplement (doi:10.3390/ma16144927), 2023-07-10
Supplement: s1 [file s1]

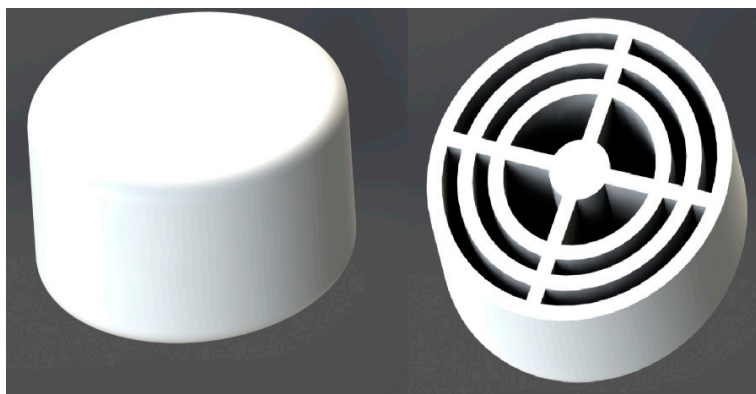

**Figure S1.** Exterior (left) and interior (right) layout of the pill shell designed by Solid works.

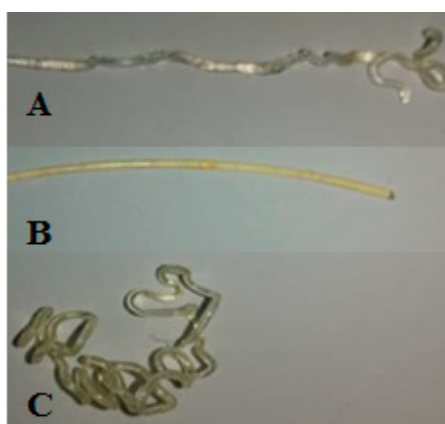

**Figure S2.** From top to bottom: A) brittle filament; B) extrudable and printable filament; C) extrudable but not printable filament.

**Table S1.** Different formulations of HPMC gel for printing by PAM

| Formulations and amounts | HPMC polymer | Solvent volume (mL) | Extrudability | Printability |
|--------------------------|--------------|---------------------|---------------|--------------|
| F1                       | 10           | 200                 | ×             | ×            |
| F2                       | 20           | 200                 | ✓             | ✓            |
| F3                       | 30           | 200                 | ✓             | ×            |

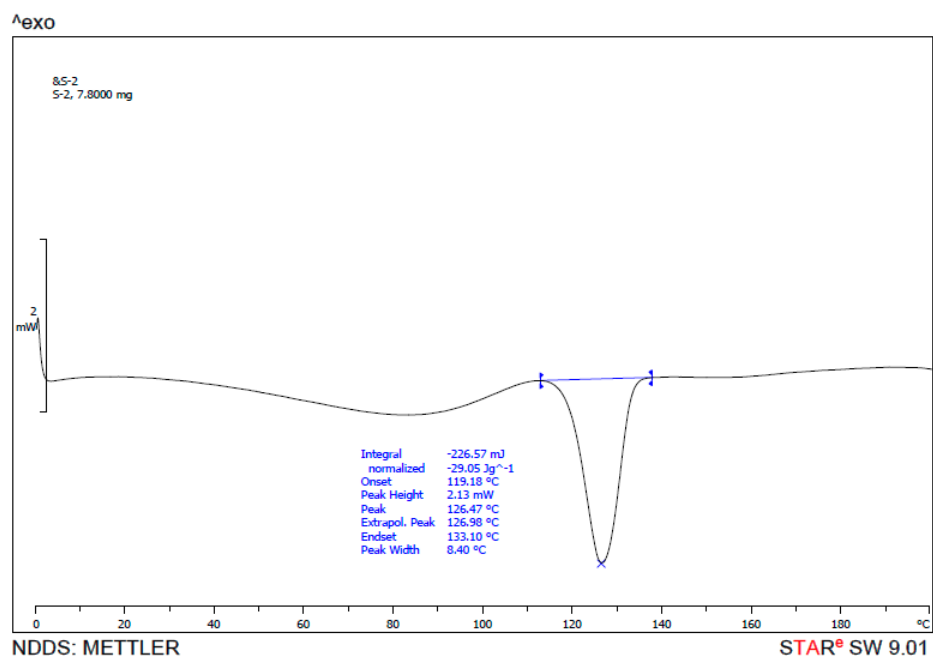

**Figure S3.** Diagram of DSC thermal analysis of Tacrolimus

**Table S2.** Assay determination of 3D printed tablet of Tacrolimus

| Assay             |        |                       |              |
|-------------------|--------|-----------------------|--------------|
|                   | Area   | Concentration (ug/ml) | % Assay      |
| <b>Injection1</b> | 227.00 | 19.82                 | 99.10        |
| <b>Injection2</b> | 229.40 | 20.02                 | 100.12       |
| <b>Injection3</b> | 223.00 | 19.48                 | 97.40        |
| <b>Average</b>    | 226.47 | 19.77                 | <b>98.87</b> |
| <b>STD</b>        | 3.23   | 0.28                  | 1.38         |
| <b>RSD</b>        | 1.43   | 1.39                  | 1.39         |

**Table S3.** Content uniformity assay of 3D printed pills

| Tablet no.           | Area  | concentration (ug/ml) | %         |
|----------------------|-------|-----------------------|-----------|
| Tablet 1             | 223   | 19.39                 | 97.0      |
| Tablet 2             | 237   | 20.67                 | 103.4     |
| Tablet 3             | 230.7 | 20.14                 | 100.7     |
| Tablet 4             | 235   | 20.50                 | 102.5     |
| Tablet 5             | 226   | 19.73                 | 98.7      |
| Tablet 6             | 234   | 20.42                 | 102a.1    |
| Tablet 7             | 219   | 19.14                 | 95.7      |
| Tablet 8             | 213   | 18.63                 | 93.1      |
| Tablet 9             | 220   | 19.22                 | 96.1      |
| Tablet 10            | 241   | 21.01                 | 105.1     |
| Average( $\bar{X}$ ) | 227.8 | 19.89                 | 99.4      |
| STD                  | 8.91  | 0.76                  | 3.8       |
| RSD (S)              | 3.91  | 3.82                  | 3.8       |
| T=Target             |       | 99                    |           |
| Average( $\bar{X}$ ) |       | 99.4                  |           |
| S                    |       | 3.8                   |           |
| Acceptance Value     | KS    | 9.12                  | Limit <15 |

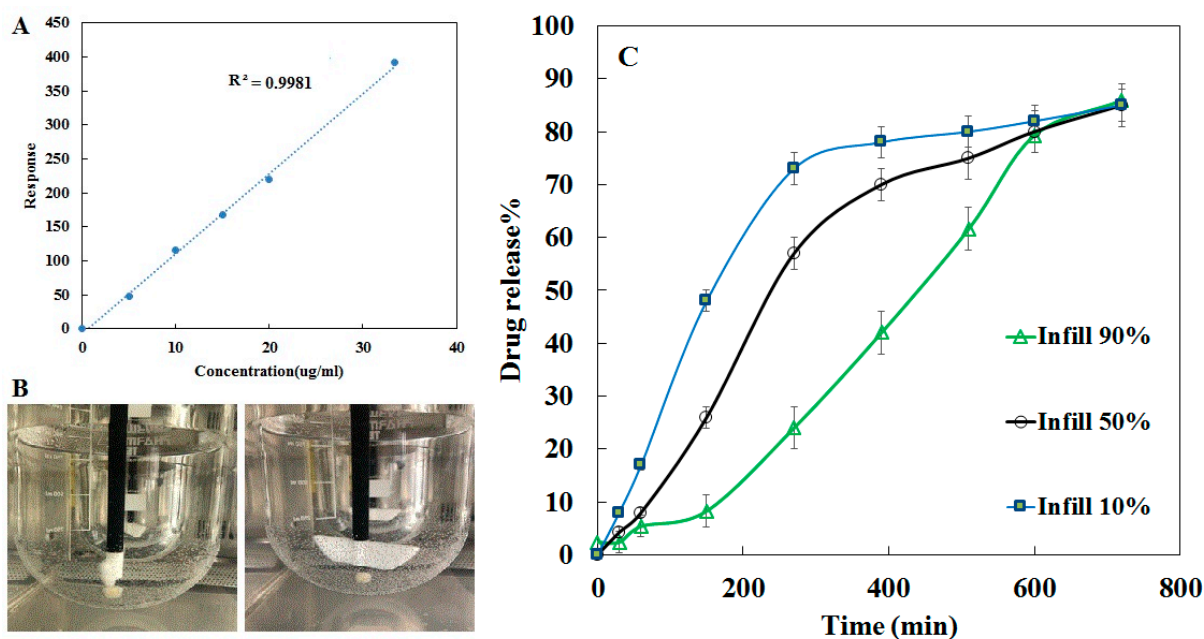

**Figure S4.** Calibration curve of tacrolimus standards for determination of dissolution samples (A). Photos taken from dissolutions 3D printed pill after 2h (Left side) and 8h (right side) (B). Dissolution profiles in the different infill % of the 3D printed tablet..

**Table S4.** Weight variation of 3D printed tablet of Tacrolimus.

| Row  | Weight (mg) |
|------|-------------|
| 1    | 591         |
| 2    | 568         |
| 3    | 597         |
| 4    | 582         |
| 5    | 570         |
| 6    | 597         |
| 7    | 560         |
| 8    | 596         |
| 9    | 590         |
| 10   | 599         |
| Mean | 585         |
| STD  | 14.20       |
| RSD  | 2.43        |

**Table S5.** The results of tablet friability for 3D printed tablet of tacrolimus

| Friability Test |             |
|-----------------|-------------|
| Row             | Weight (mg) |
| Mean W0         | 589.8       |
| Mean Wf         | 589.1       |
| % Friability    | 0.12        |
| %AV             | 1.00        |
